# Supplementary material for: Reactogenicity to major tuberculosis antigens absent in BCG is linked to improved protection against Mycobacterium tuberculosis
Source: PubMed Central journal article supplement (PMC5519979; doi:10.1038/ncomms16085), 2017-07-14
Supplement: ncomms16085-s1.pdf [file ncomms16085-s1.pdf]

File name: Supplementary Information  
Description: Supplementary Figures

File name: Peer Review File  
Description:

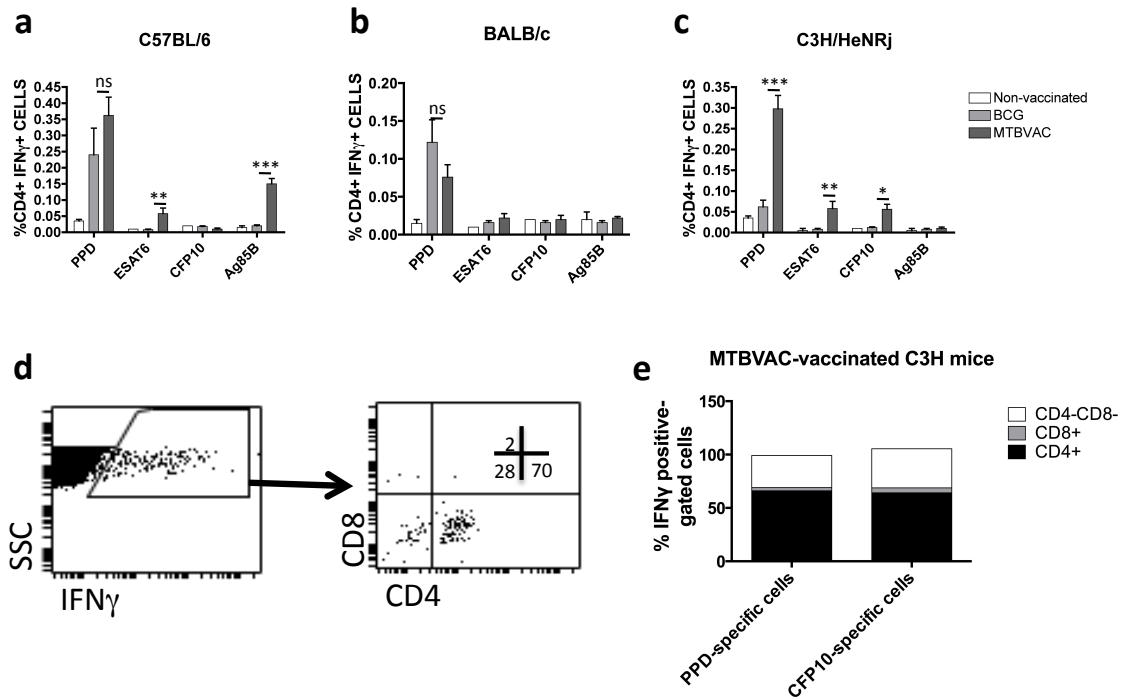

**Supplementary Figure 1.** Percentage of IFN $\gamma$ -producing CD4 $^{+}$  splenocytes from mock-, BCG- and MTBVAC- vaccinated C57BL/6 (a), BALB/c (b) and C3H/HeNRj (c) mice following stimulation with PPD (5  $\mu$ g/ml), ESAT6 (2  $\mu$ g/ml), CFP10 (2  $\mu$ g/ml) and Ag85B (2  $\mu$ g/ml). Data are representative from one of two independent experiments (n=5 mice/group/experiment). All data are mean  $\pm$  SEM. ns, non-significant; \*, p < 0.05; \*\*, p < 0.01; \*\*\*, p < 0.001 by unpaired t-student test. (d), (e), CD4 $^{+}$ , CD8 $^{+}$  and CD4-CD8 $^{-}$  cells were analyzed from an IFN $\gamma$ -positive gated population of splenocytes harvested from MTBVAC-vaccinated C3H mice. (d) Representative dot-plot is shown in the figure. (e) Data from the graph is the mean from one experiment (n=5).

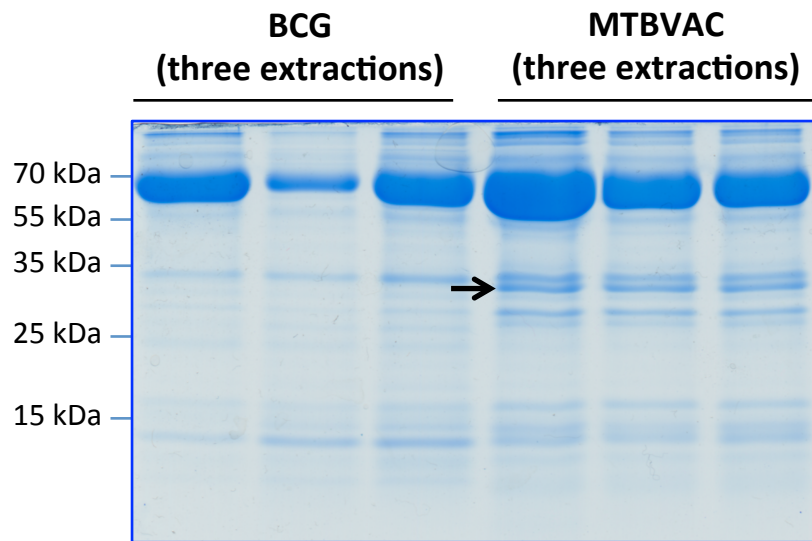

**Supplementary Figure 2.** Culture-filtrate protein samples from BCG and MTBVAC separated by SDS-PAGE and stained with Colloidal blue. Three independent extractions from each vaccine strain are represented in the image. A differential band found in MTBVAC (pointed with an arrow) was identified as Ag85B by MALDI-TOF MS.

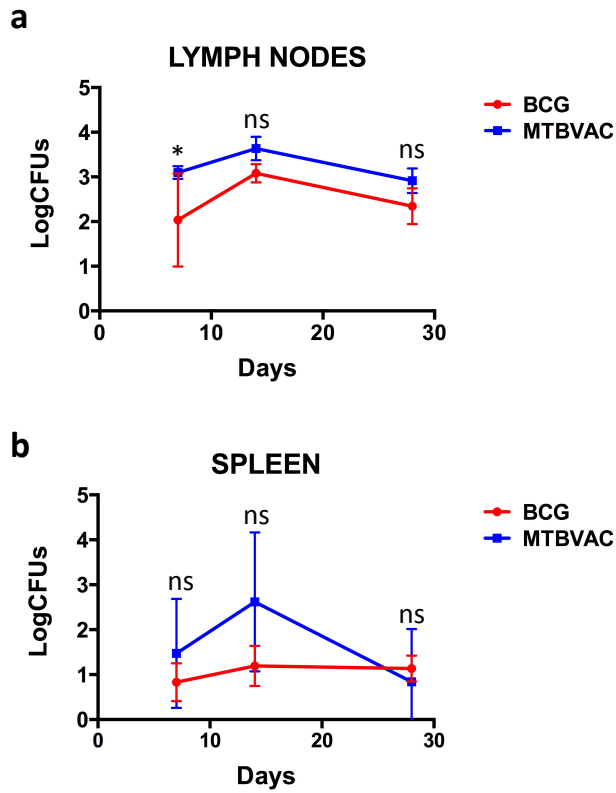

**Supplementary Figure 3.** Dissemination and replication of MTBVAC and BCG in lymphoid organs from C3H mice. MTBVAC and BCG CFUs in draining lymph nodes (inguinal and axillary) **(a)** and spleen **(b)** at 7, 14 and 28 days following subcutaneous vaccination of C3H in the right rear flank. Data are derived from n=6 mice. All data are mean  $\pm$  SD. ns, non-significant; \*,  $p < 0.05$ ; by two-way ANOVA and Bonferroni post-test.

**a**

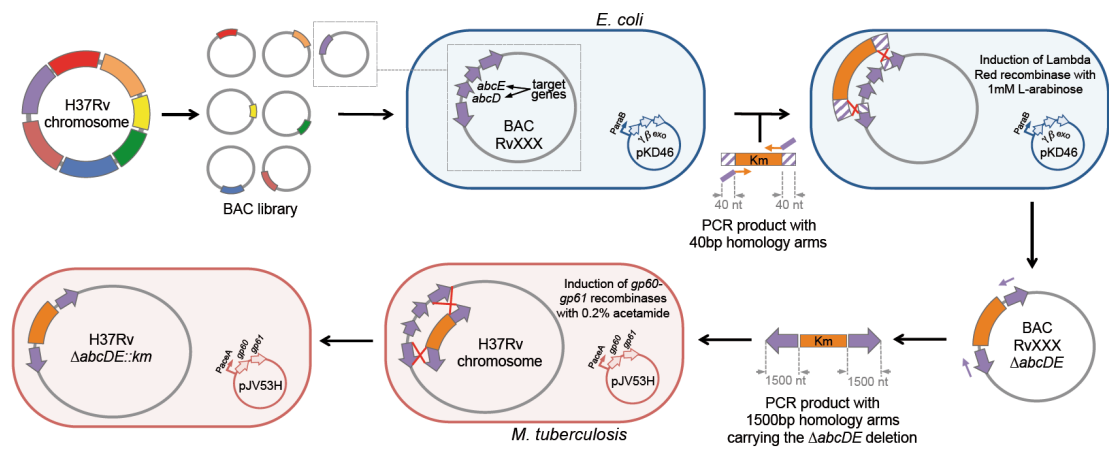

**b**

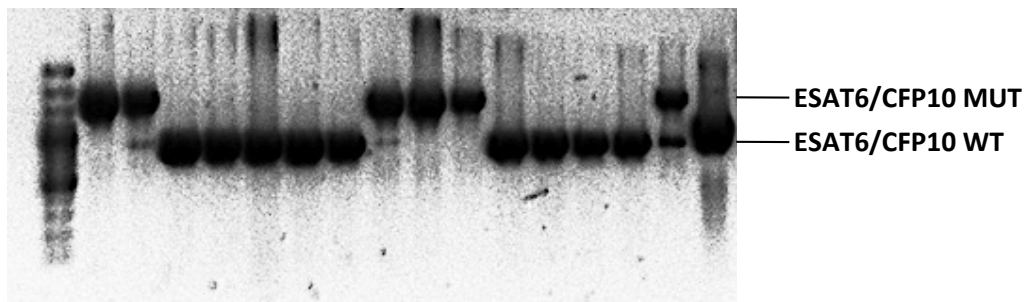

**Supplementary Figure 4.** Construction of MTBVAC mutant substrains. **(a)** General scheme of the method used to construct the MTBVAC mutants tested in this study. **(b)** Analysis of recombinant MTBVAC colonies after recombineering. Agarose electrophoresis shows CFP10/ESAT6 region amplified with flanking primers. Wild-type amplicon: 0.8 kbp; mutant amplicon: 1.7 kbp.

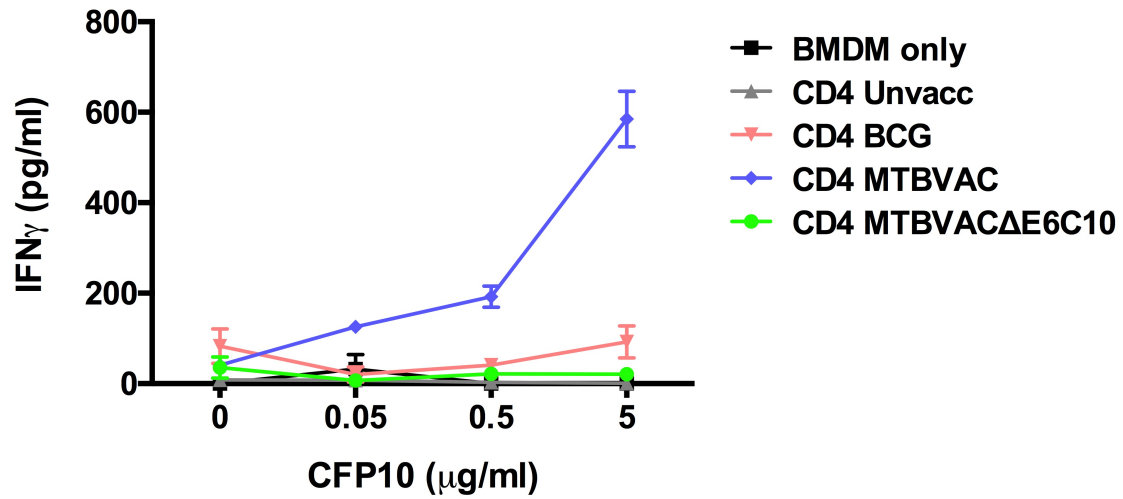

**Supplementary Figure 5.** *In vitro* CFP10 presentation assay. IFN $\gamma$  production by purified CD4<sup>+</sup> splenocytes from BCG-, MTBVAC- and MTBVAC $\Delta$ E6C10- vaccinated, or unvaccinated C3H/HeNRj mice following incubation with syngeneic BMDM previously pulsed with CFP10 increasing concentrations. Data represent the mean of three replicates  $\pm$  SEM.

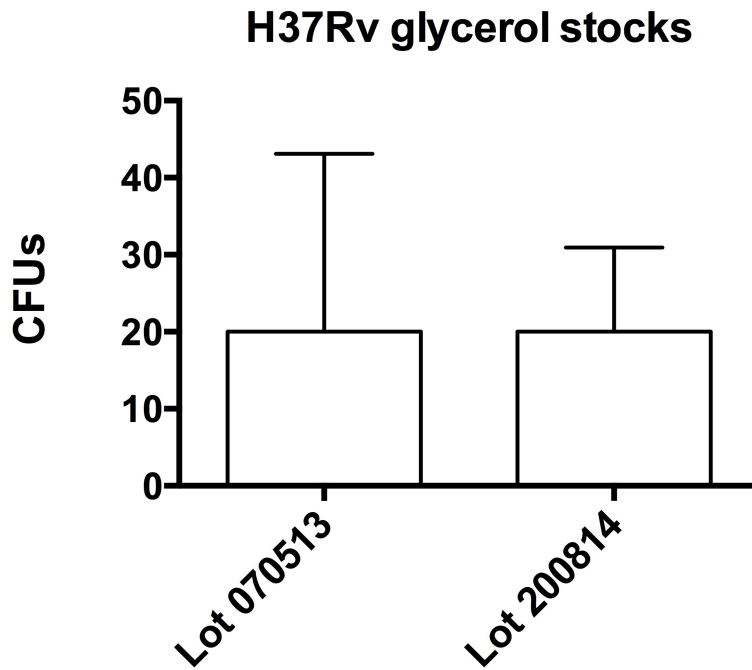

**Supplementary Figure 6.** Lung bacterial load one day post low-dose H37Rv intranasal challenge. Results correspond to the two H37Rv glycerol stocks used in the present study. Data are derived from n=10 mice (lot 070513) and n=6 mice (lot 200814). All data are mean  $\pm$  SD.

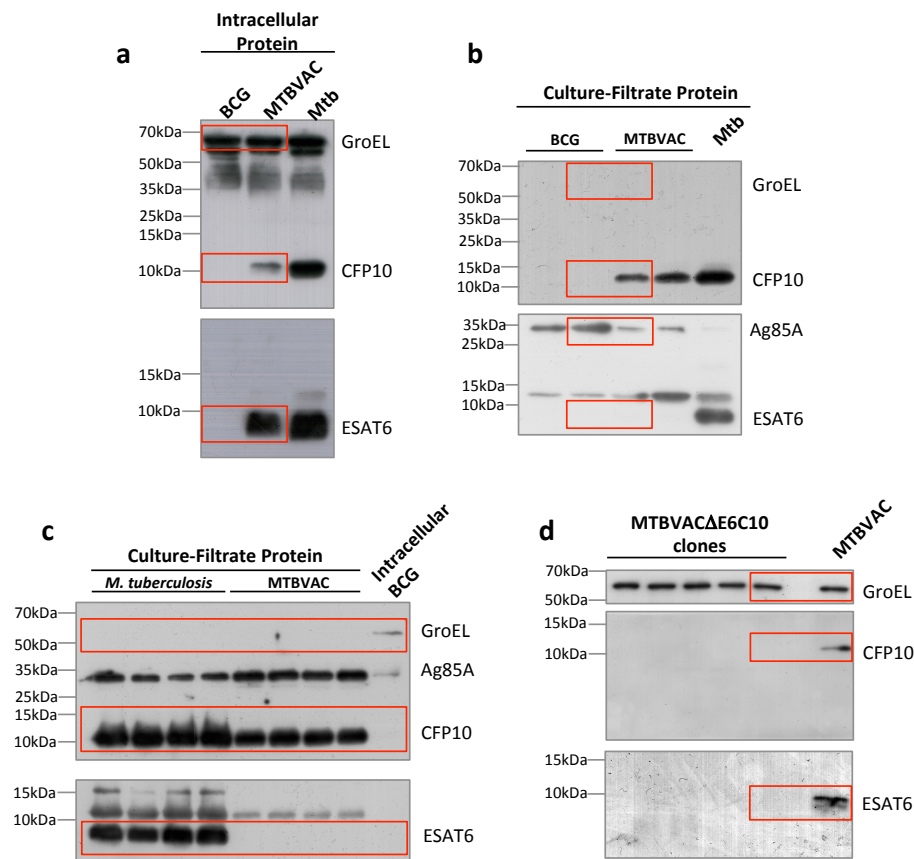

**Supplementary Figure 7.** Full western blots performed in this study. (a) Full blot corresponding to intracellular protein analysis from figure 1b. Blot was sequentially stained with anti-GroEL and anti-CFP10. Then membrane was incubated with a stripping solution and re-probed with anti-ESAT6. (b) Full blot corresponding to culture-filtrate protein fraction analysis from figure 1b. Blot was sequentially probed with anti-GroEL and anti-CFP10, and then re-probed with anti-Ag85A and anti-ESAT6 after stripping treatment. (c) Full blot corresponding to figure 1c. Blot was sequentially stained with anti-GroEL, anti-Ag85A and anti-CFP10, and then re-probed with anti- anti-ESAT6 after stripping treatment. (d) Full blot corresponding to figure 3a. Membrane was divided in two fragments. The upper one was probed with anti-GroEL, and the lower with anti-CFP10. Then, this was re-probed with anti-ESAT6 following stripping treatment. Red rectangles correspond to the blot fragments shown in the main figures.
